# Supplementary material for: Discovery and Validation of New Potential Biomarkers for Early Detection of Colon Cancer
Source: PLOS journal article supplement (doi:10.1371/journal.pone.0106748), 2014-09-12

## CA9

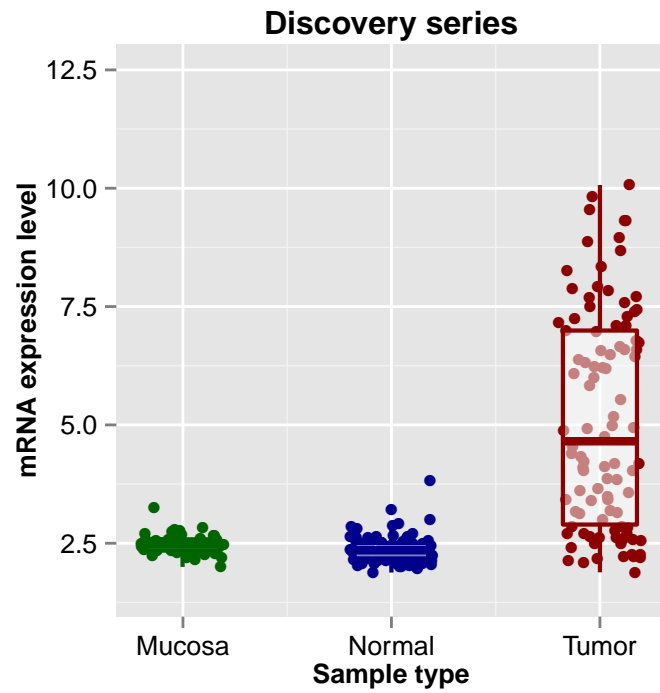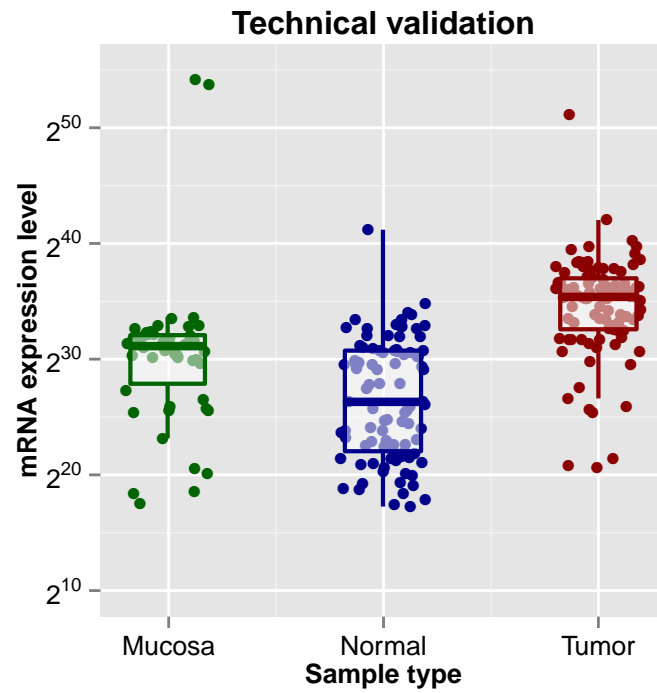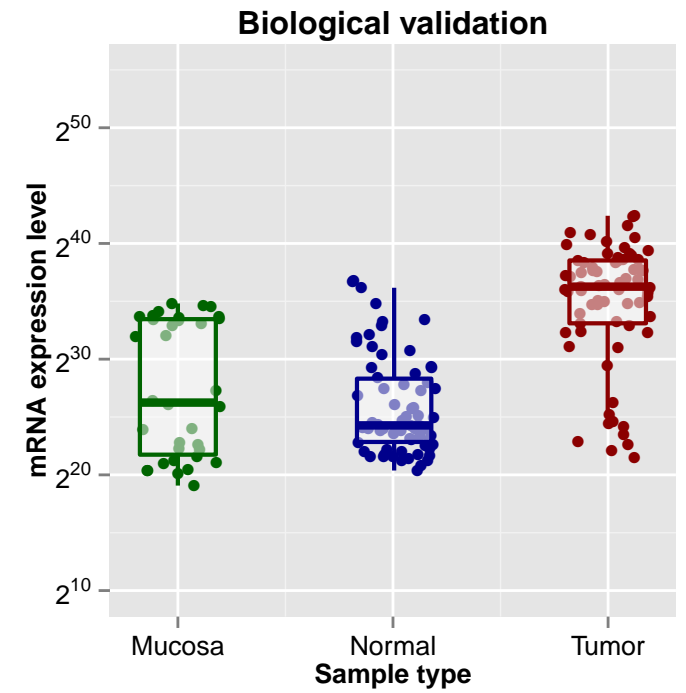

# CEL

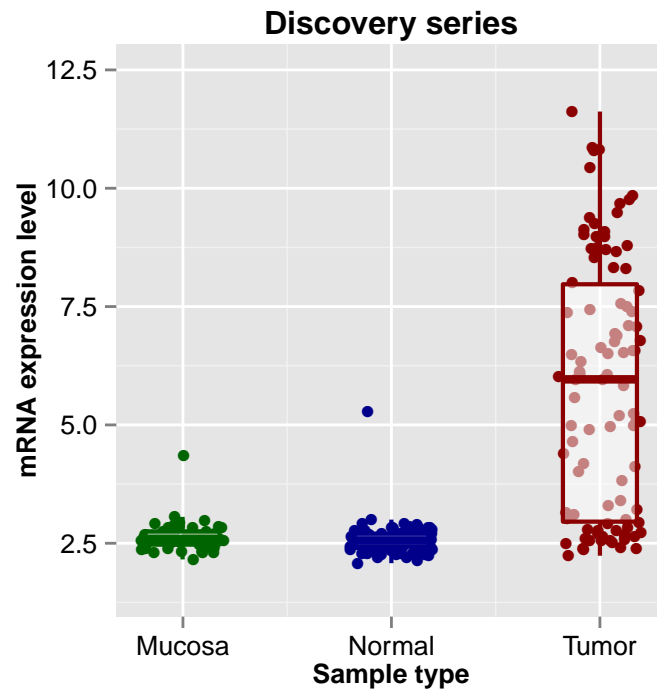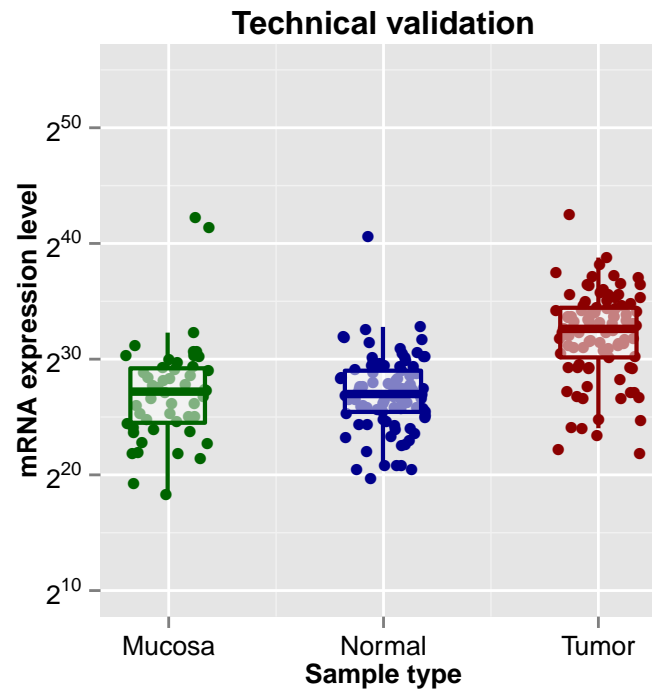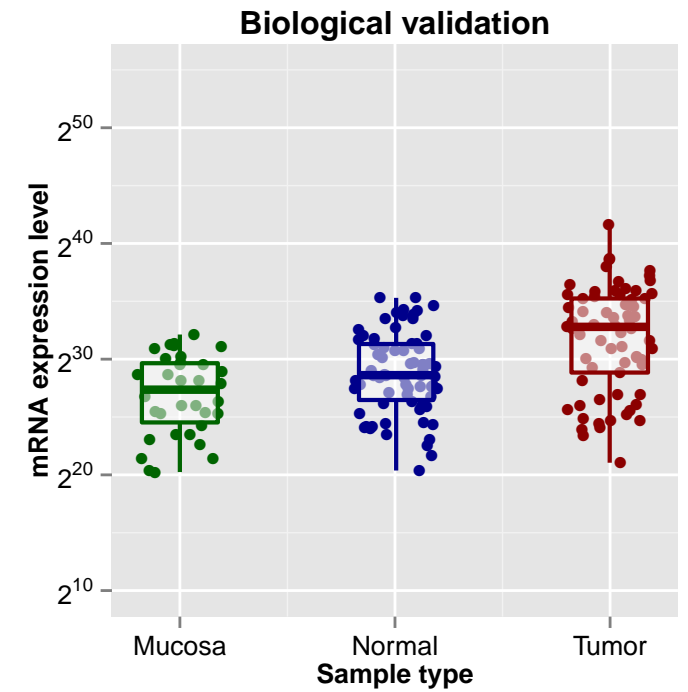

# CLDN2

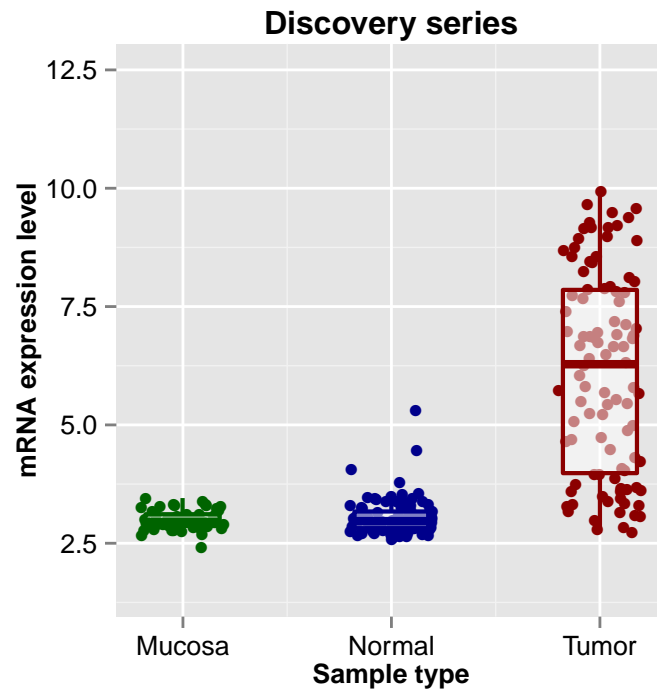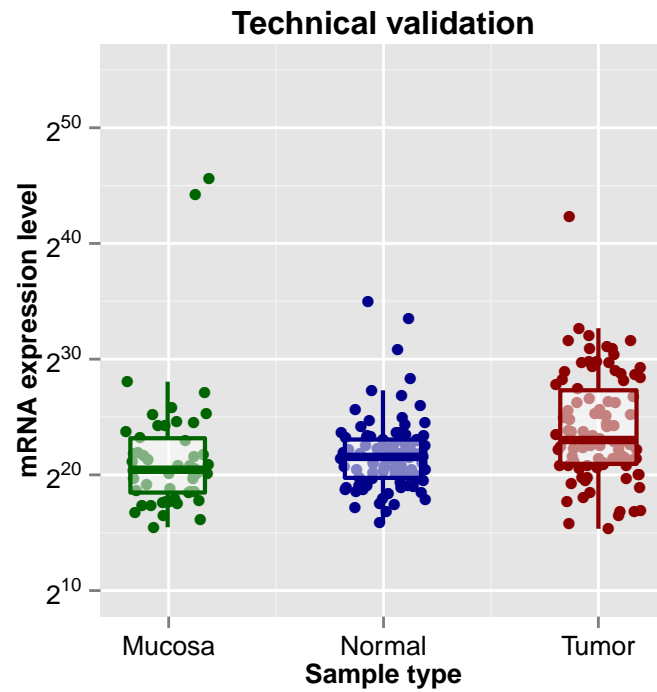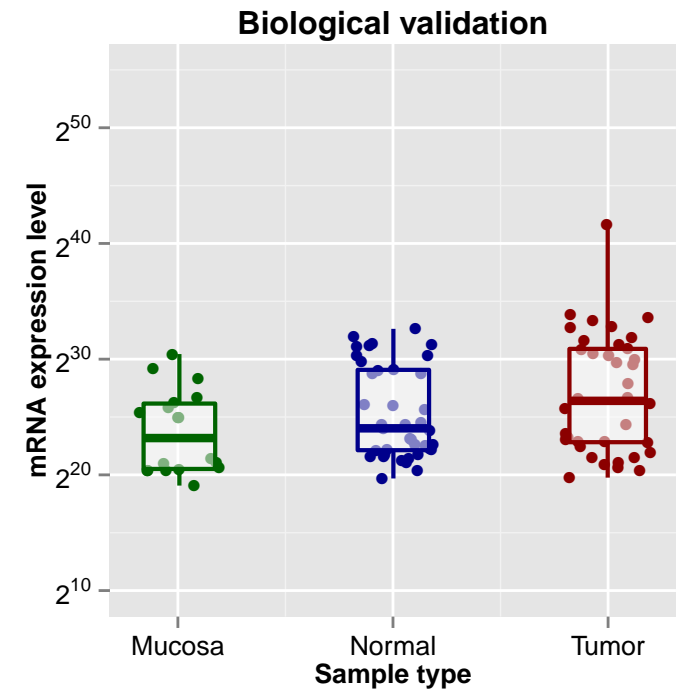

# COL10A1

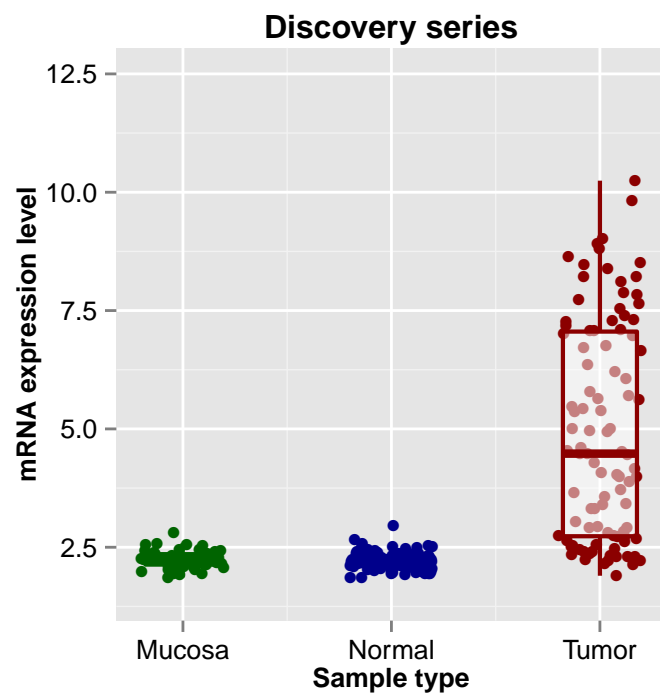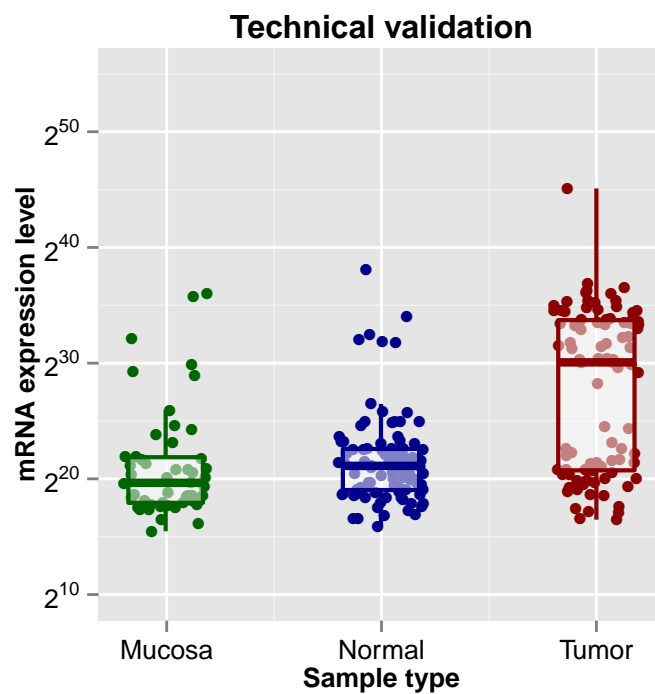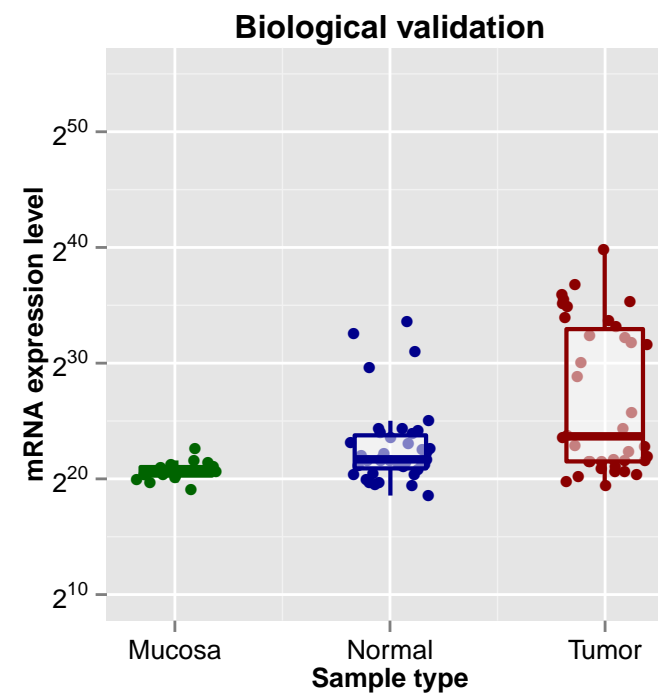

# COL11A1

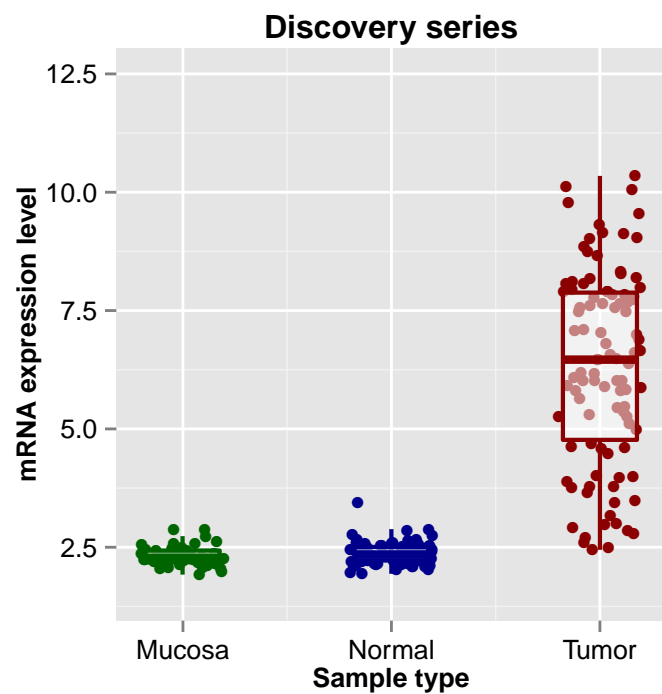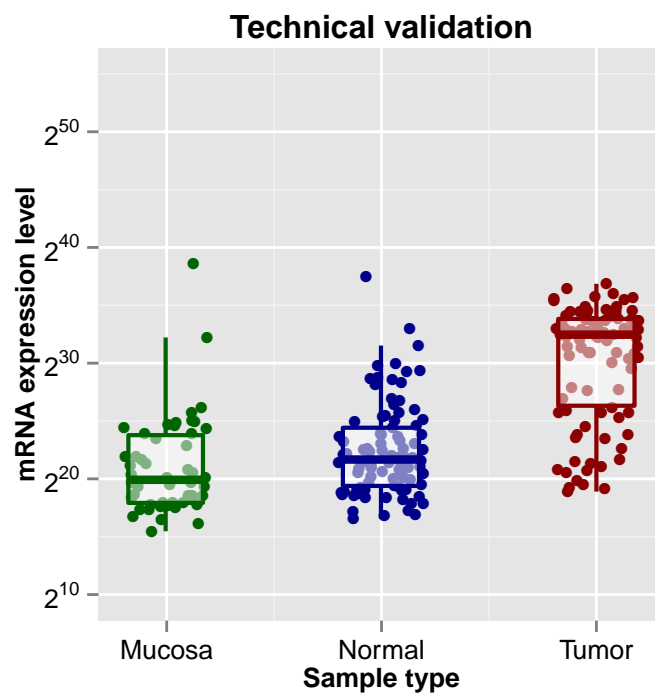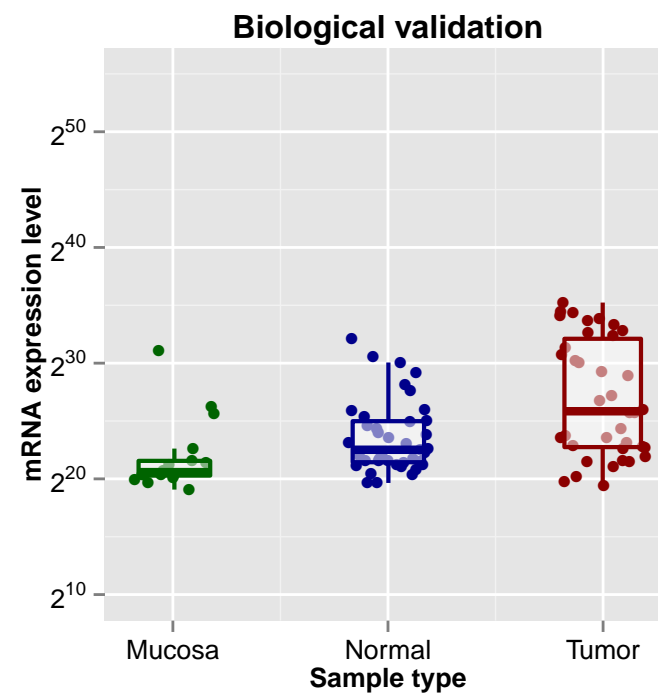

# CST1

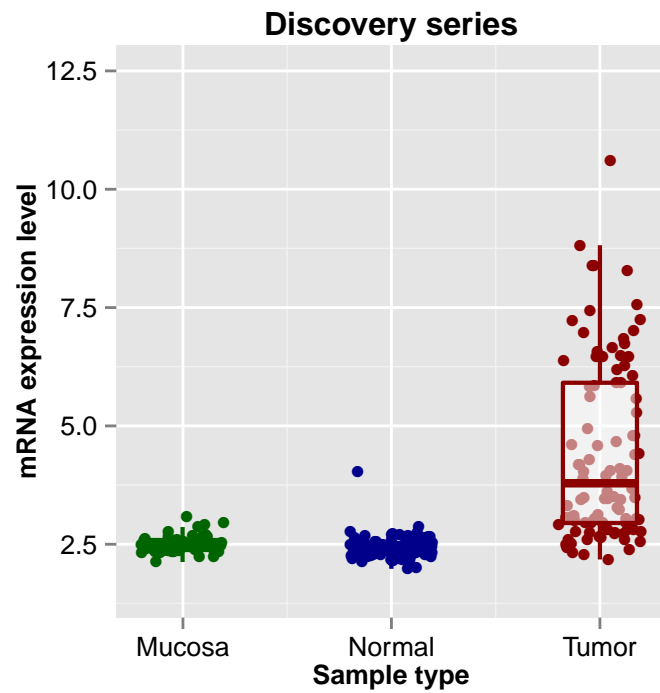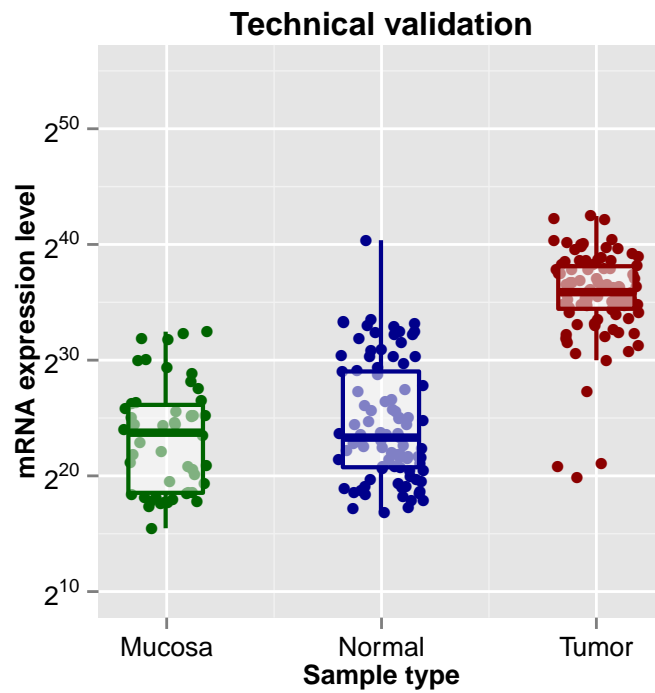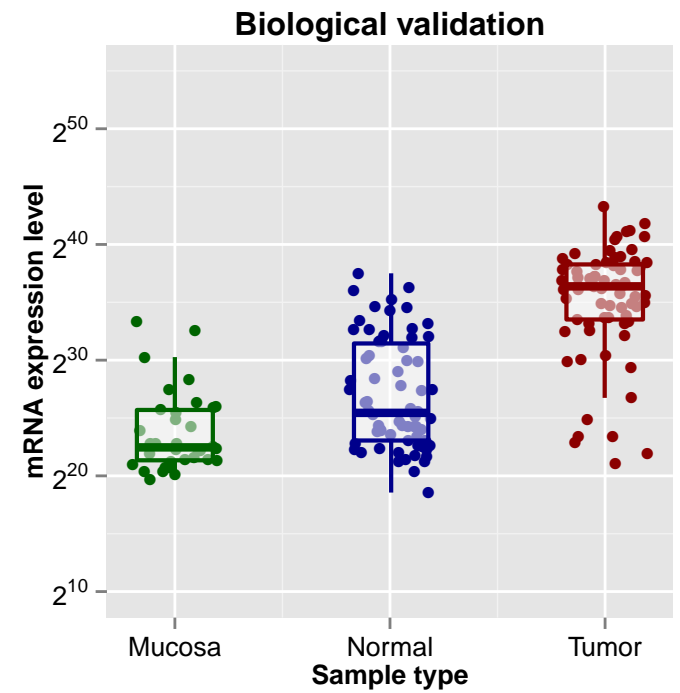

# CXCL5

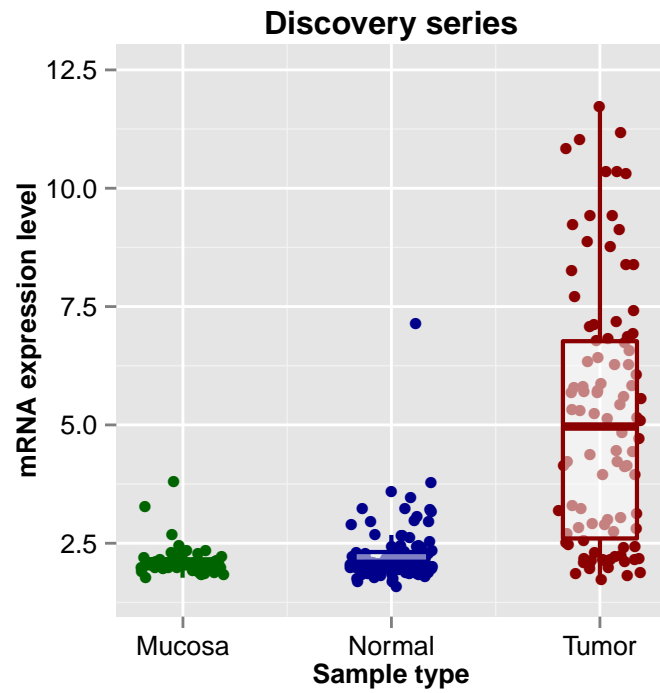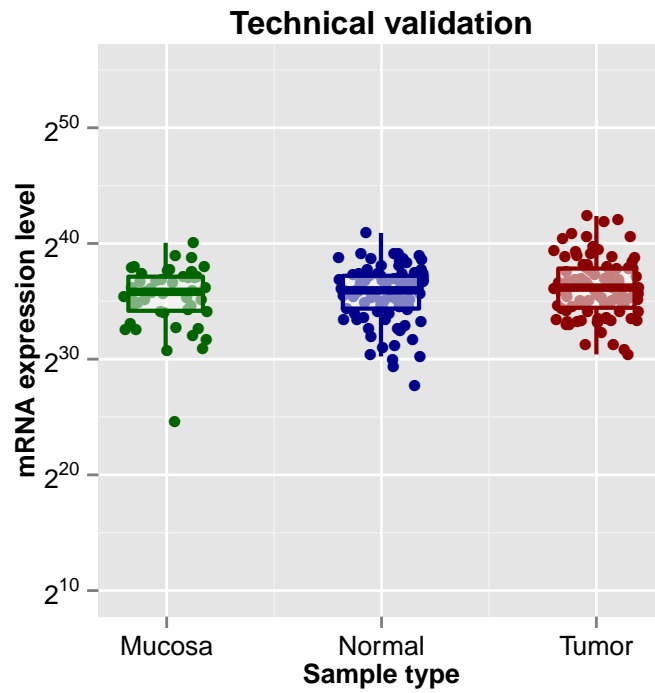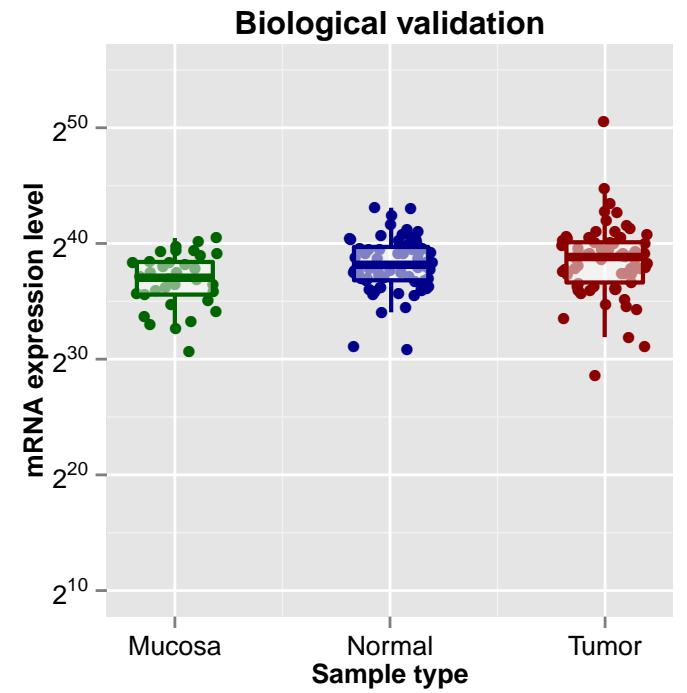

# DPT

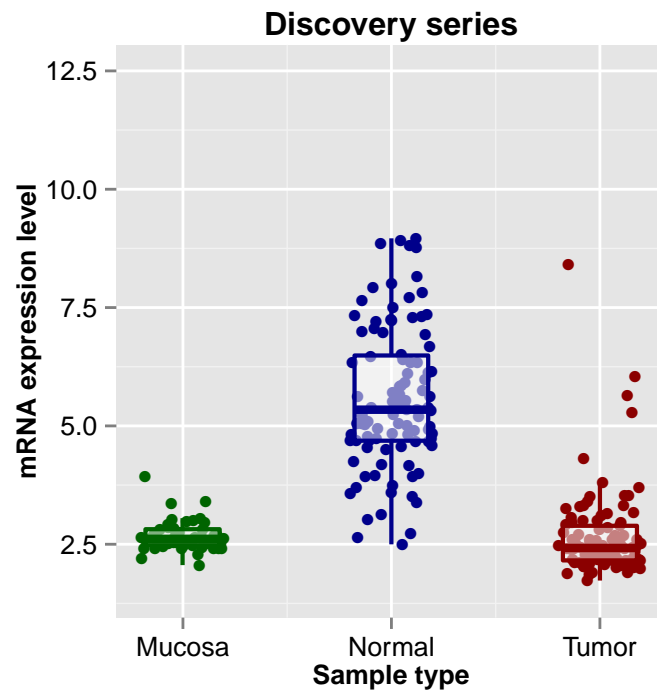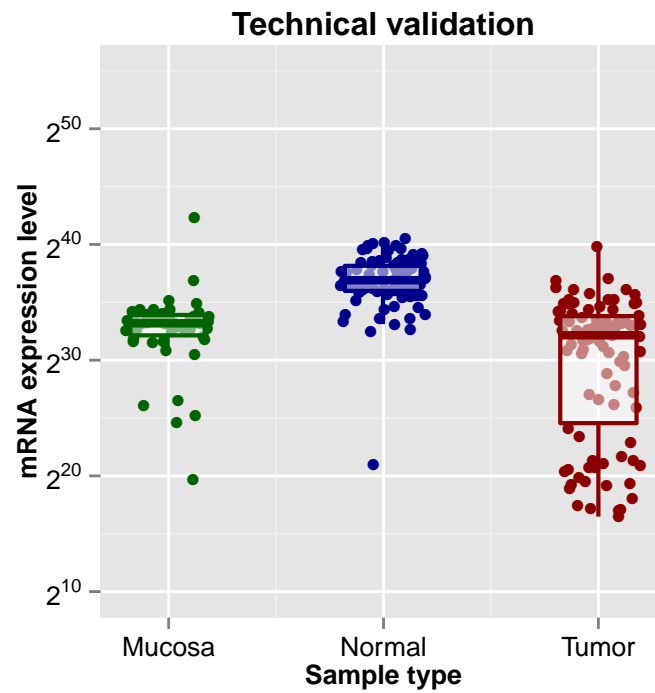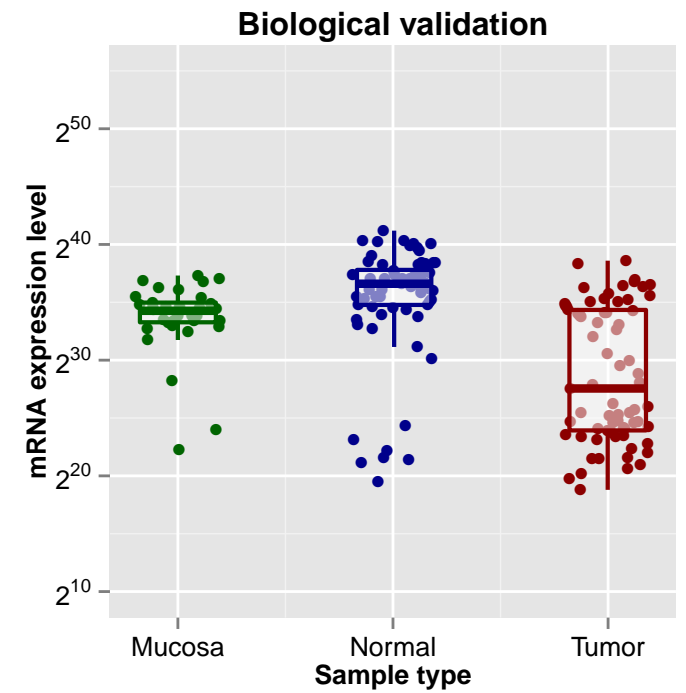



# EPHX4

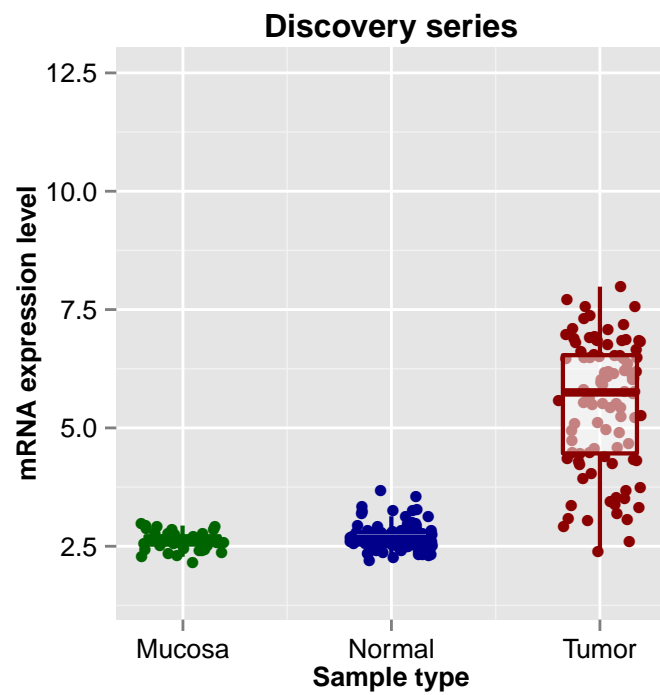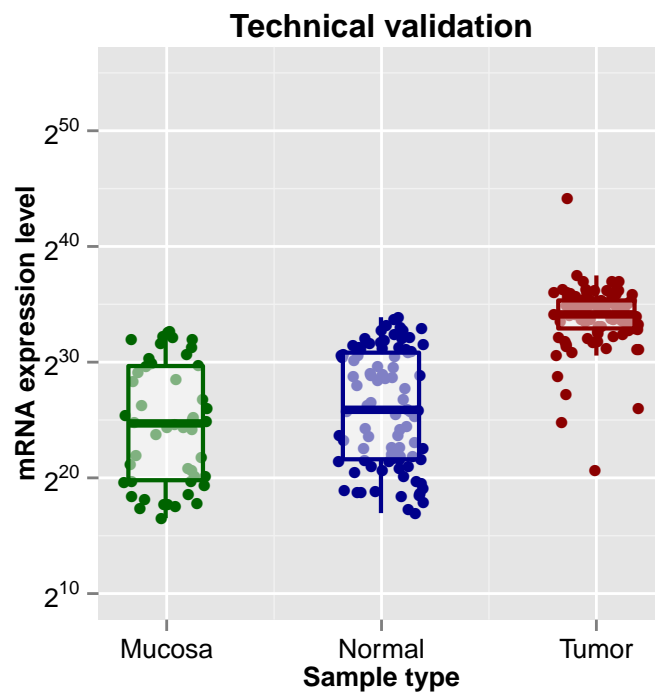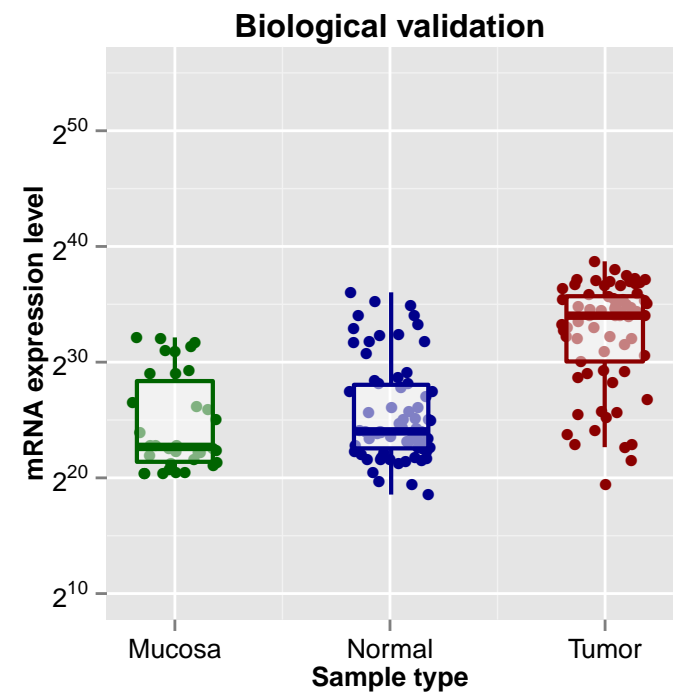

# ESM1

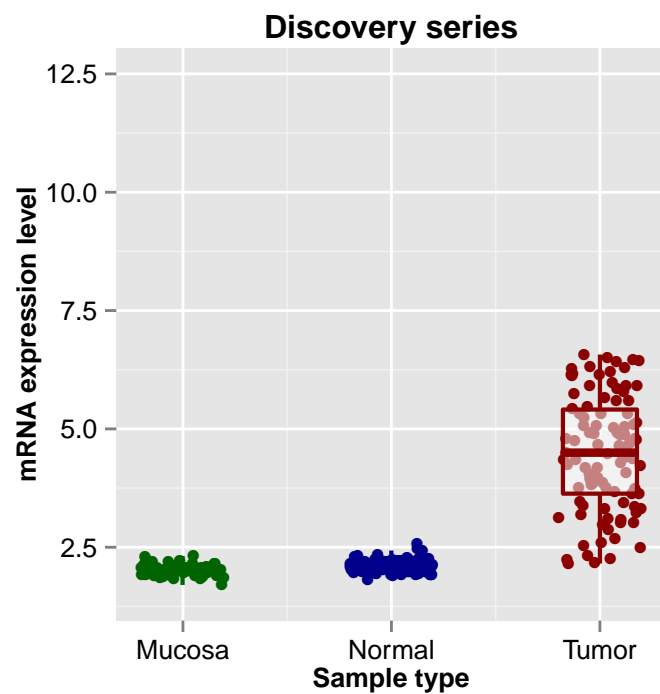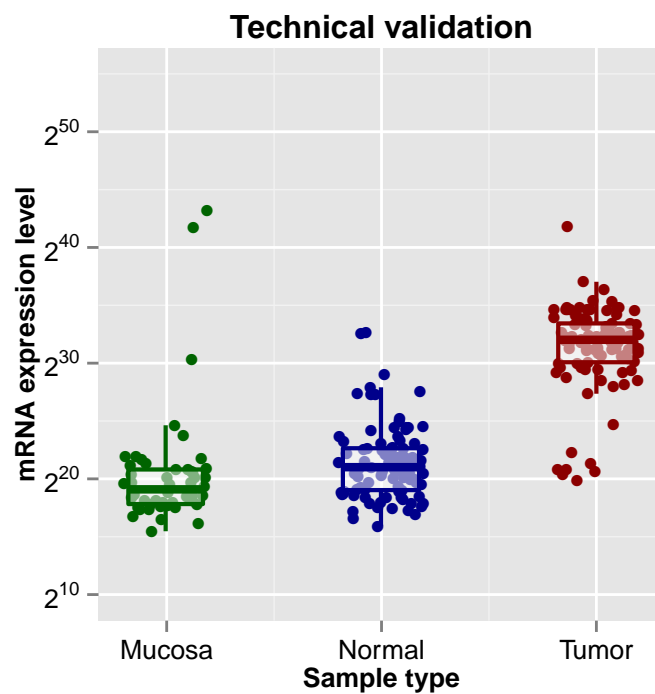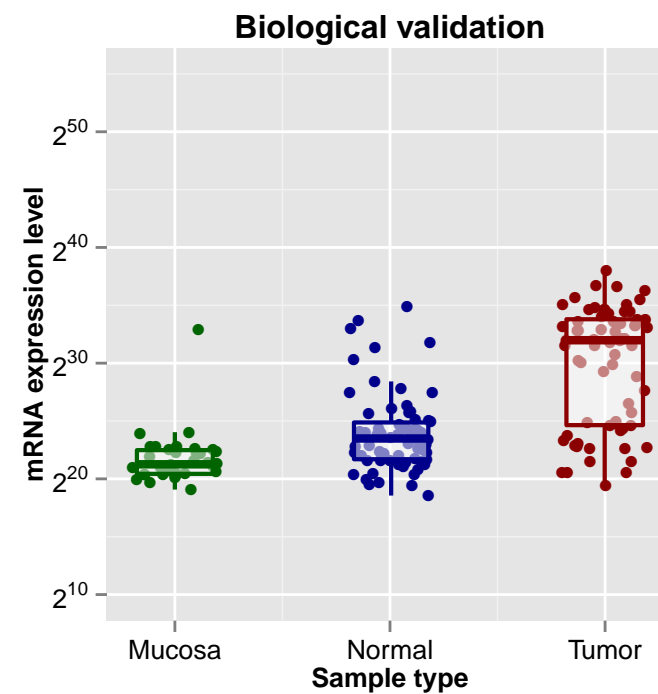

# FAP

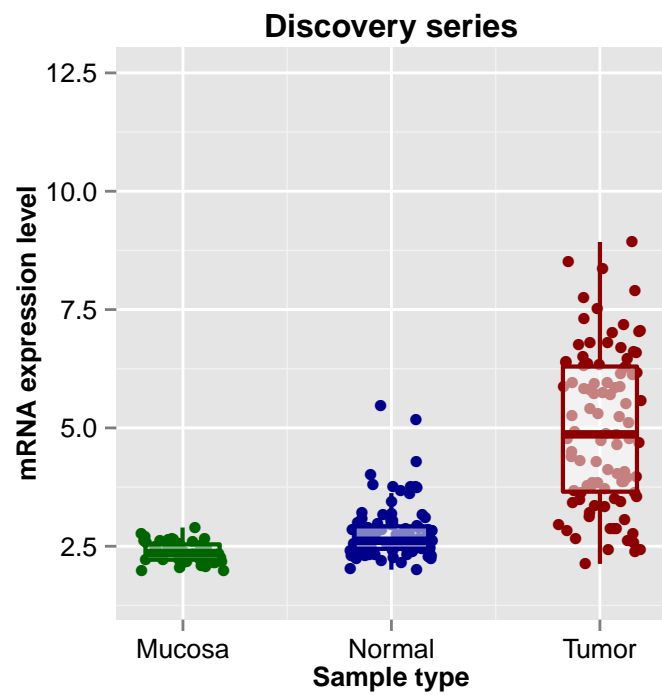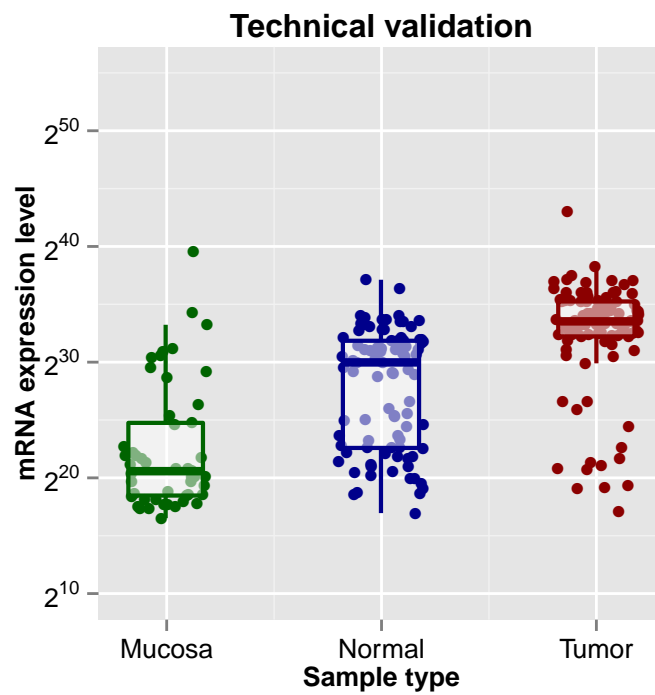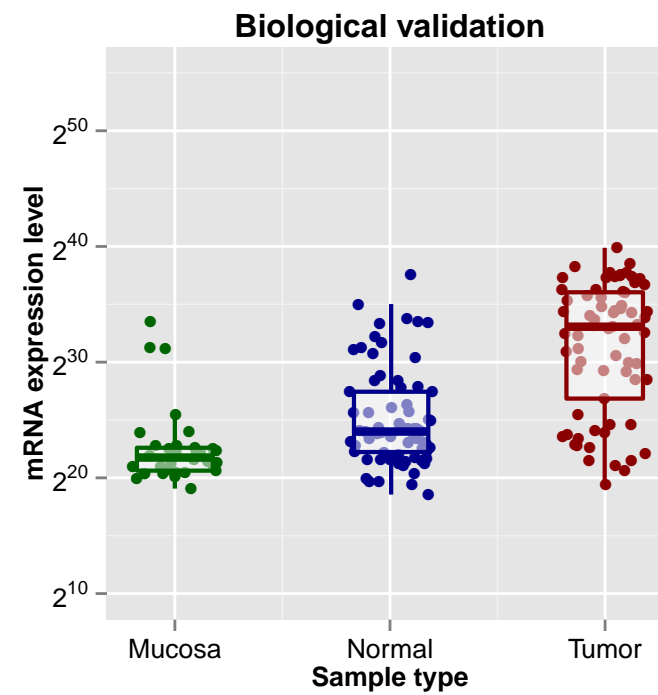

# GAL

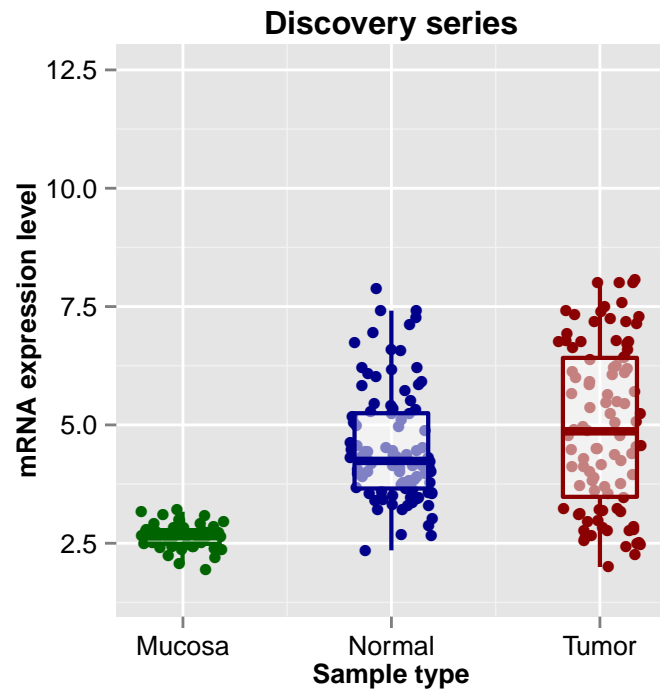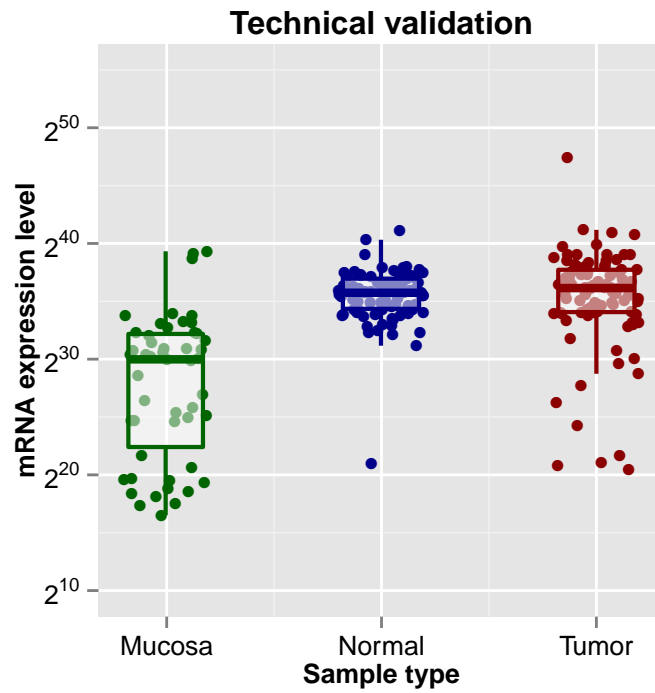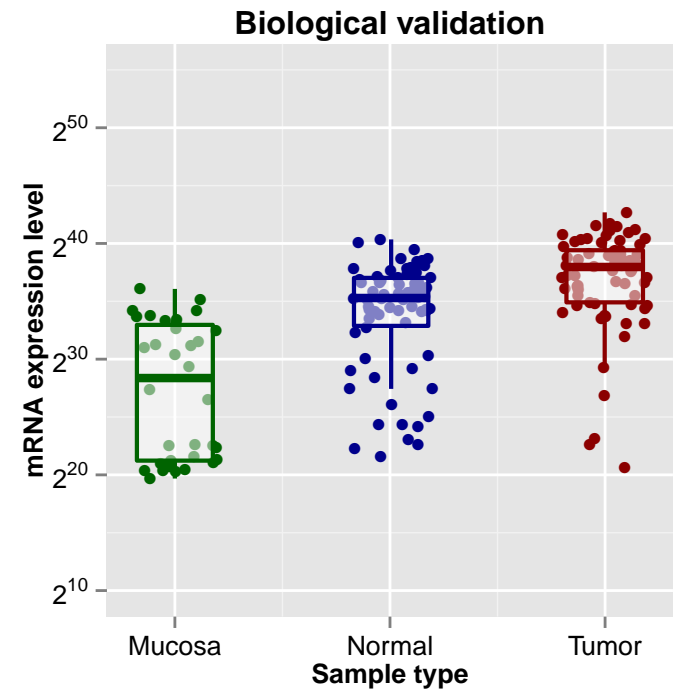

# JUB

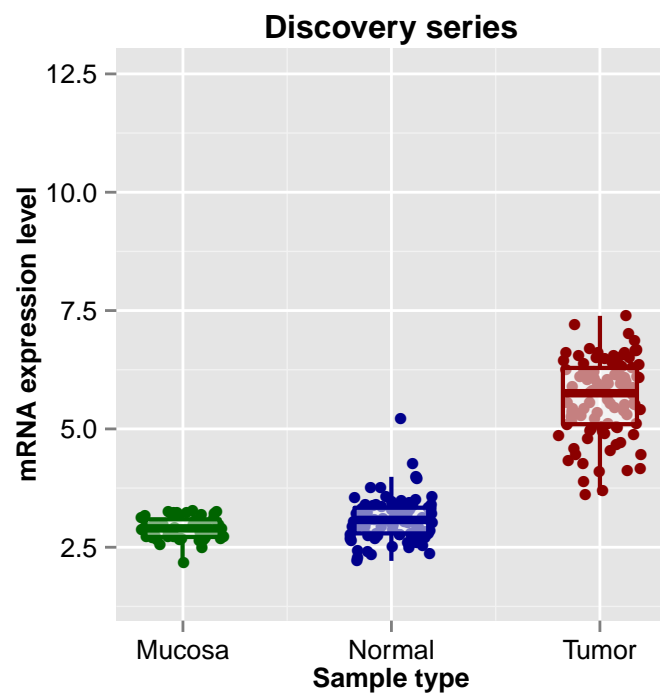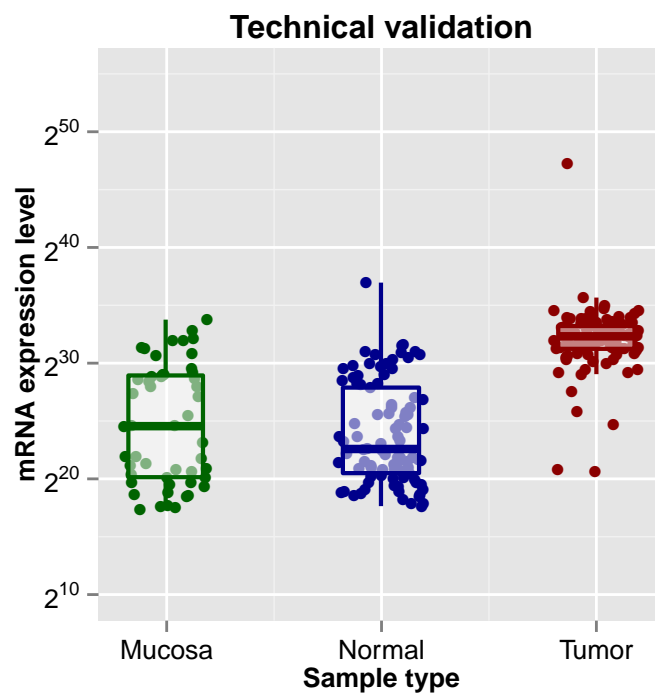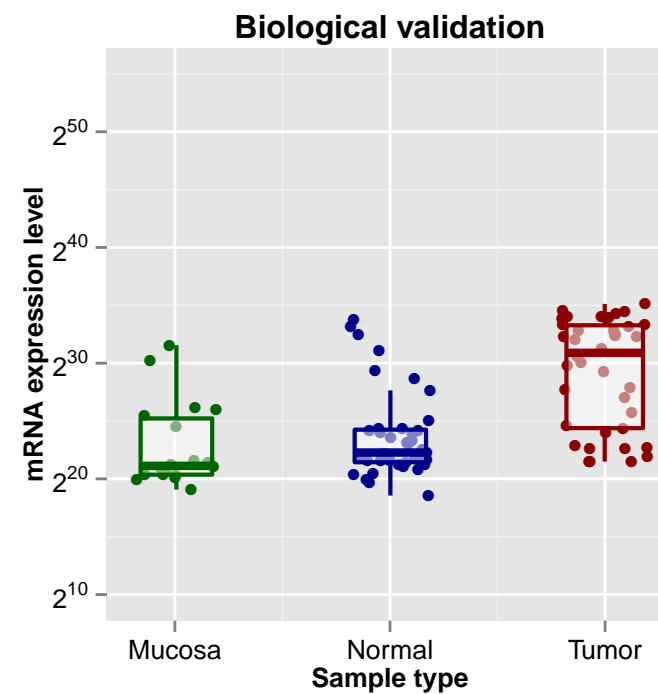

# KIAA1199

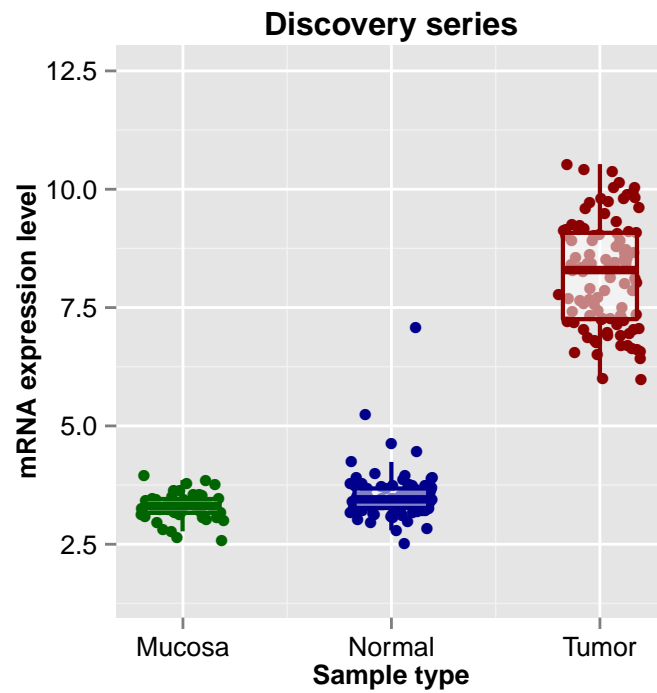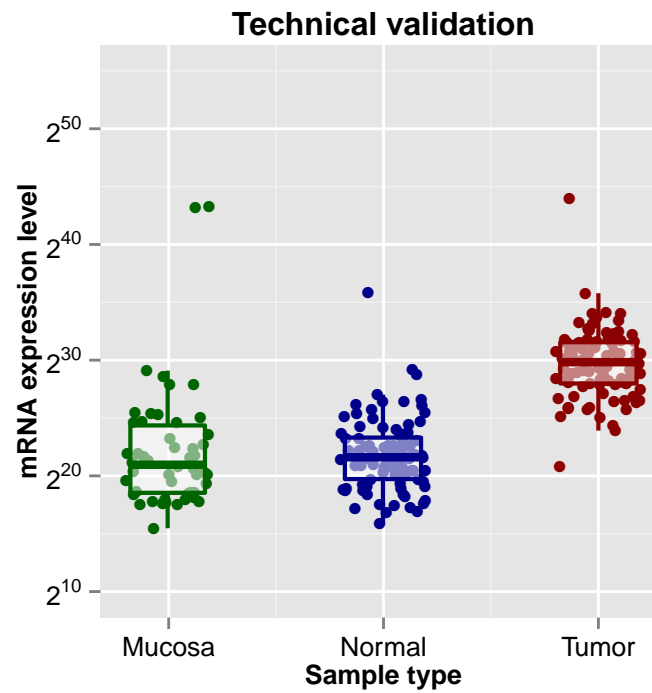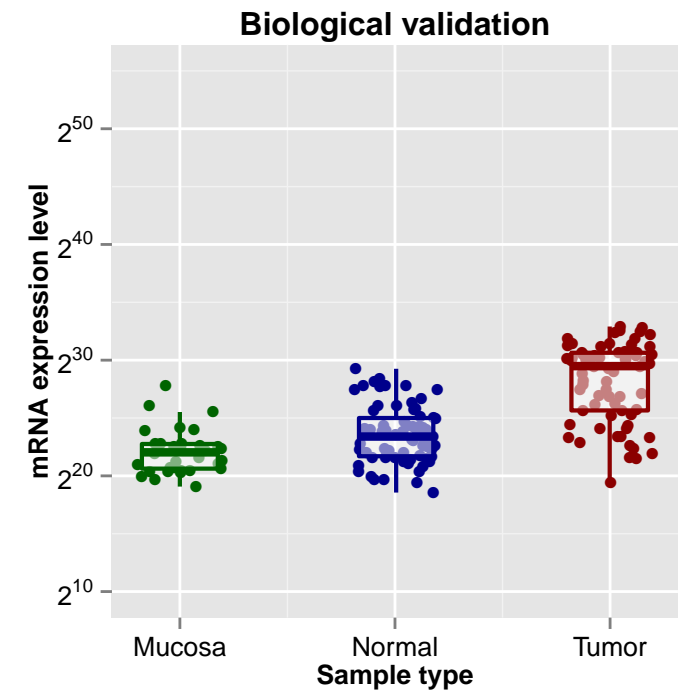

# LOC100127888

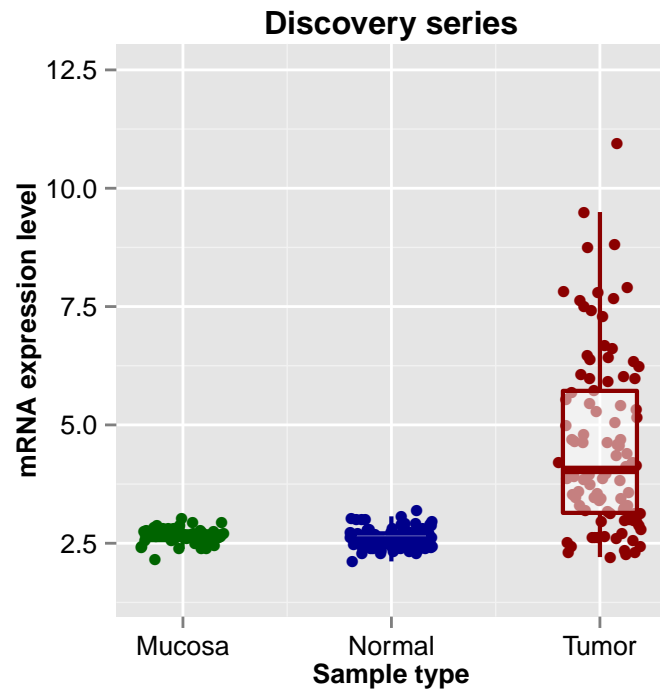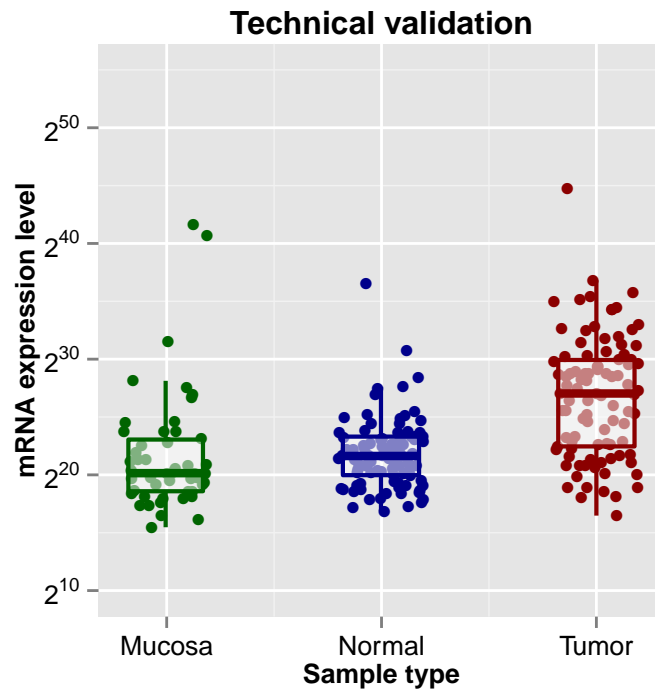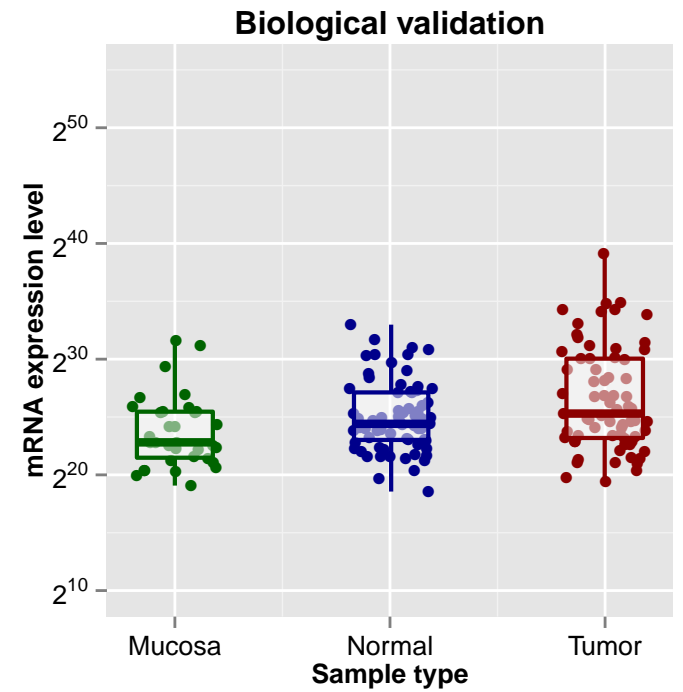

# MMP10

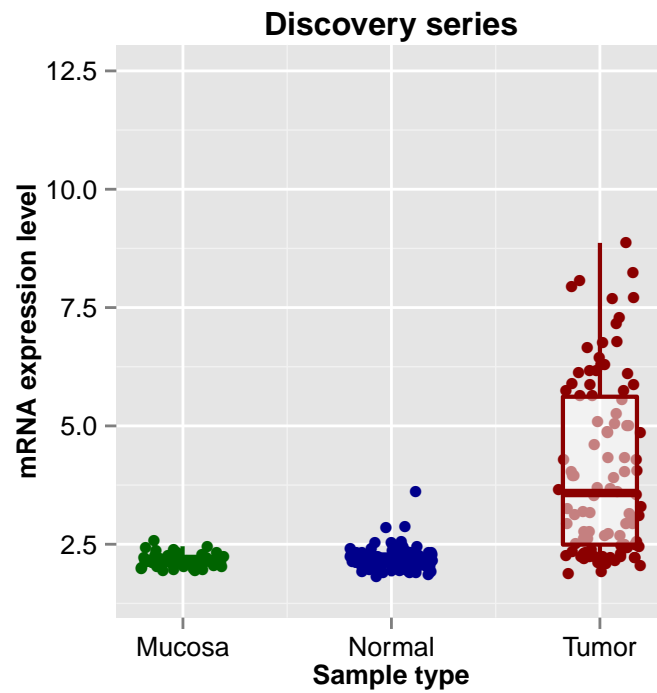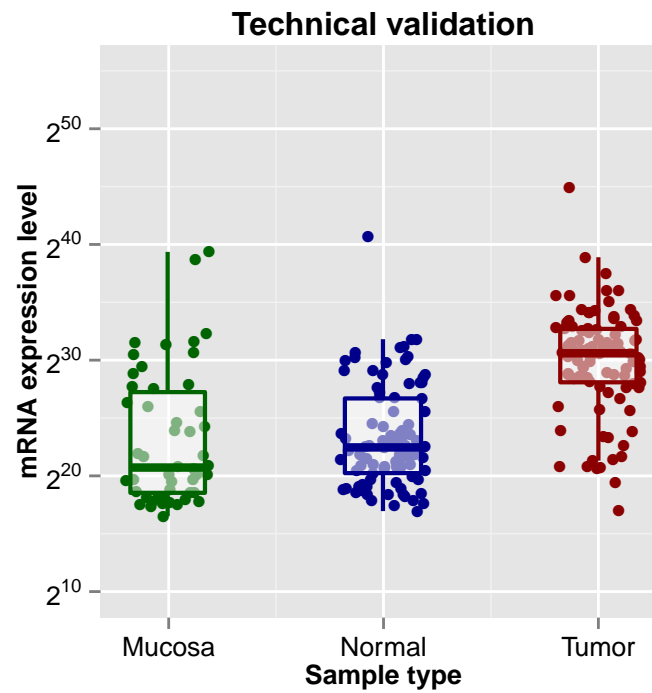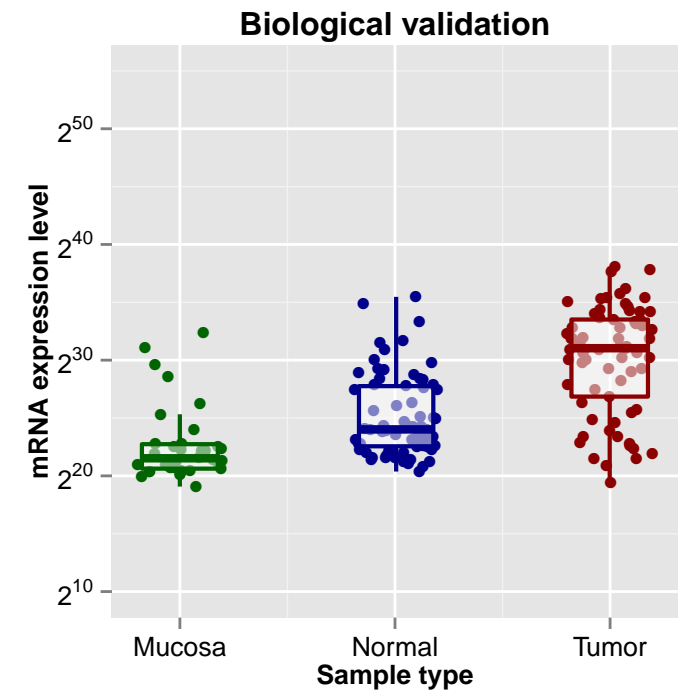



# MMP3

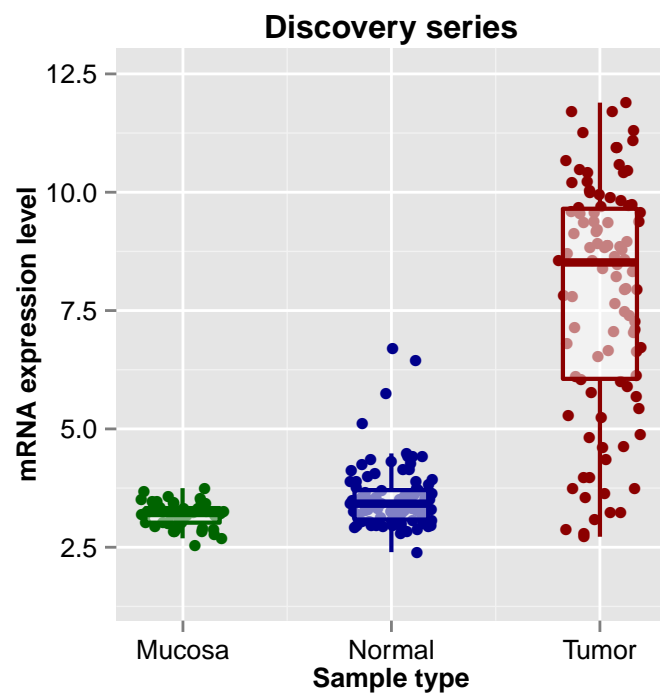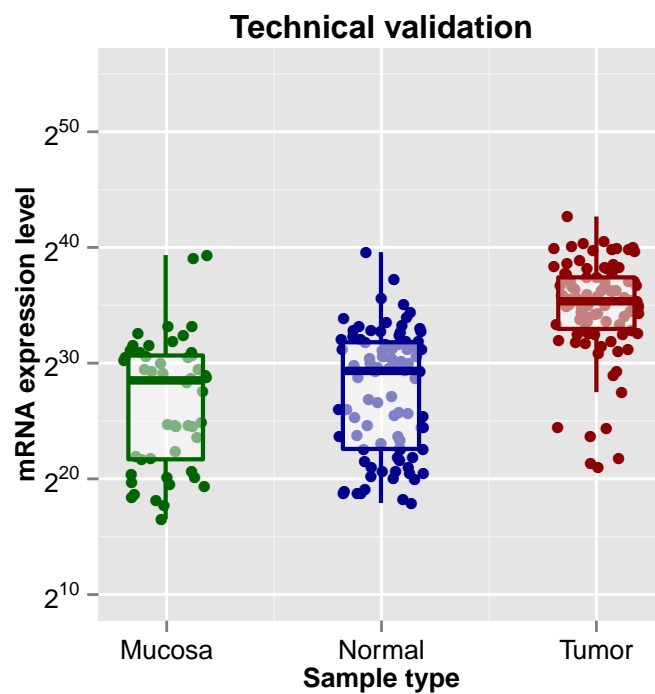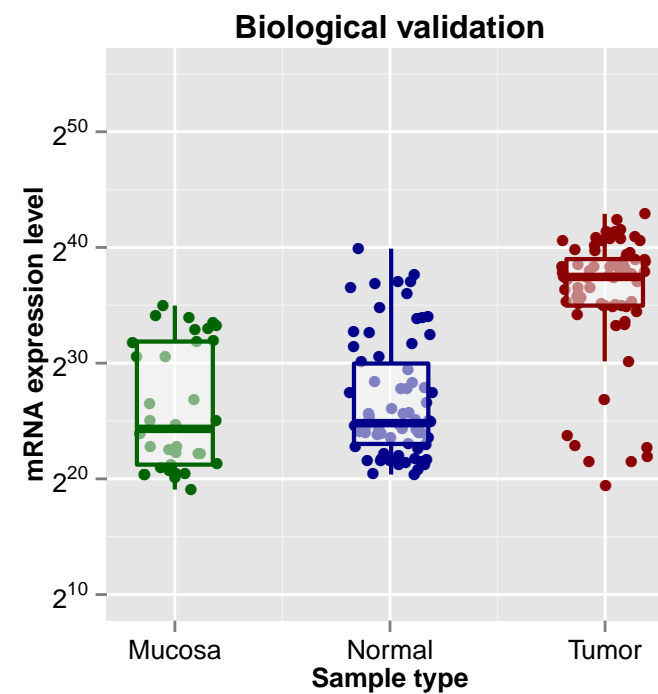

# MMP7

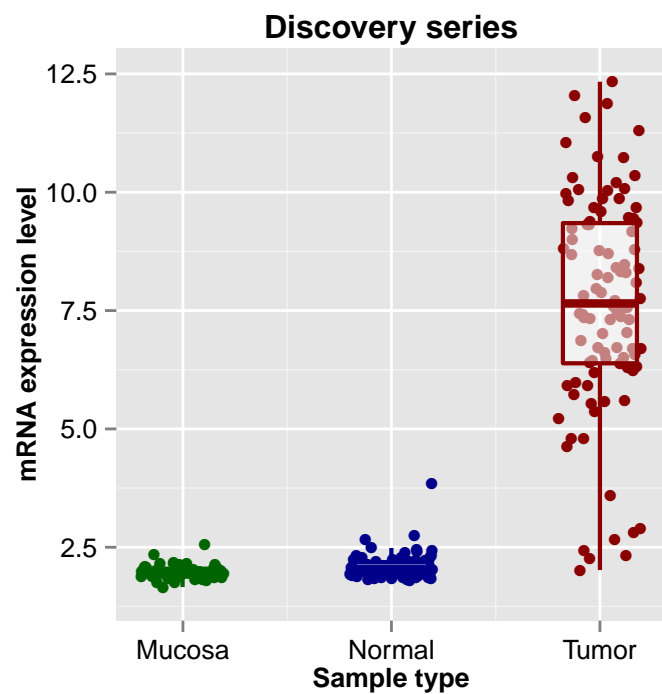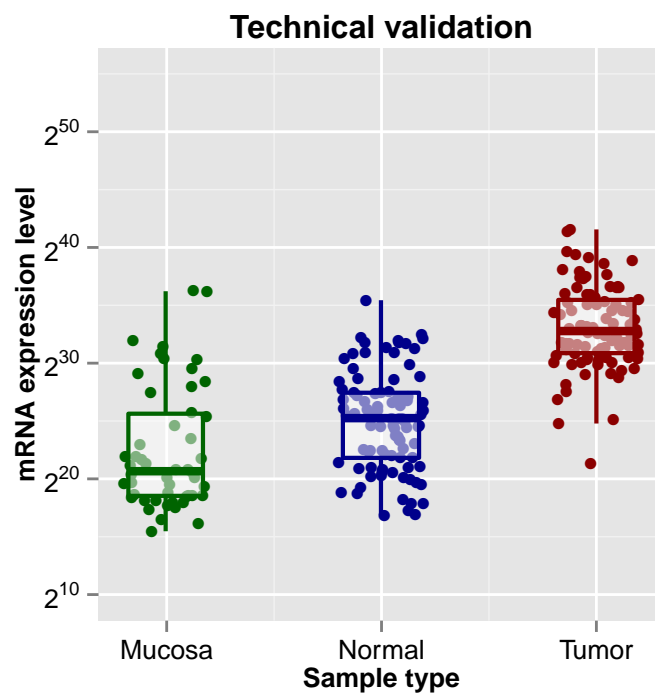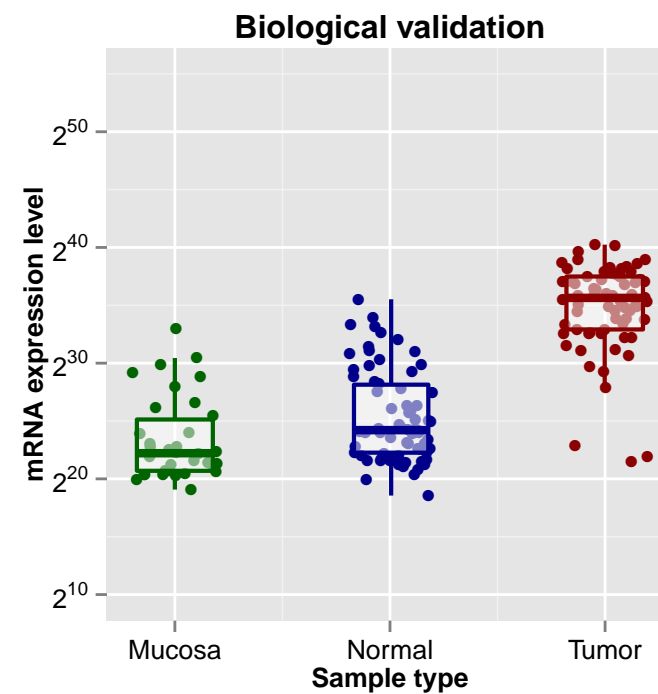

# MSX2

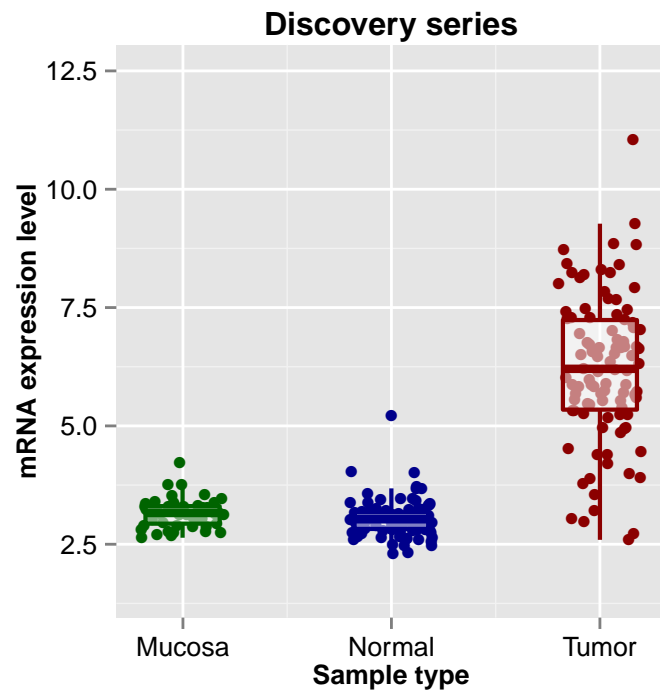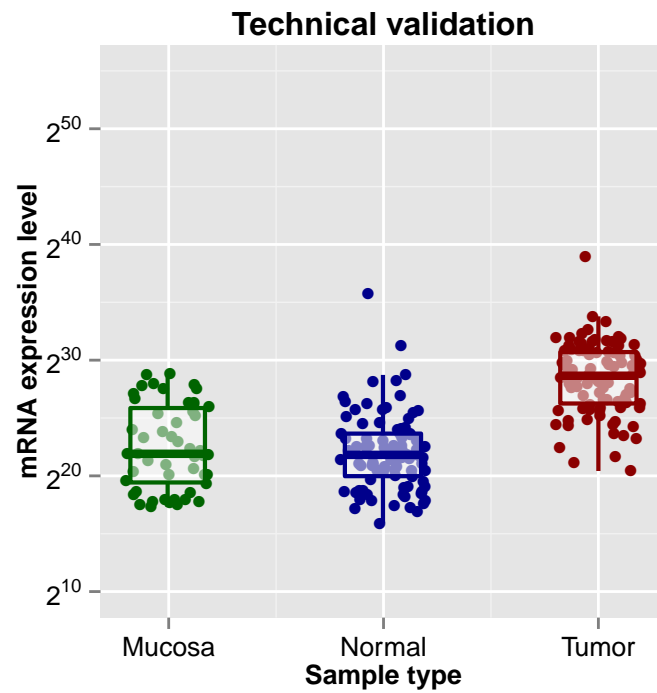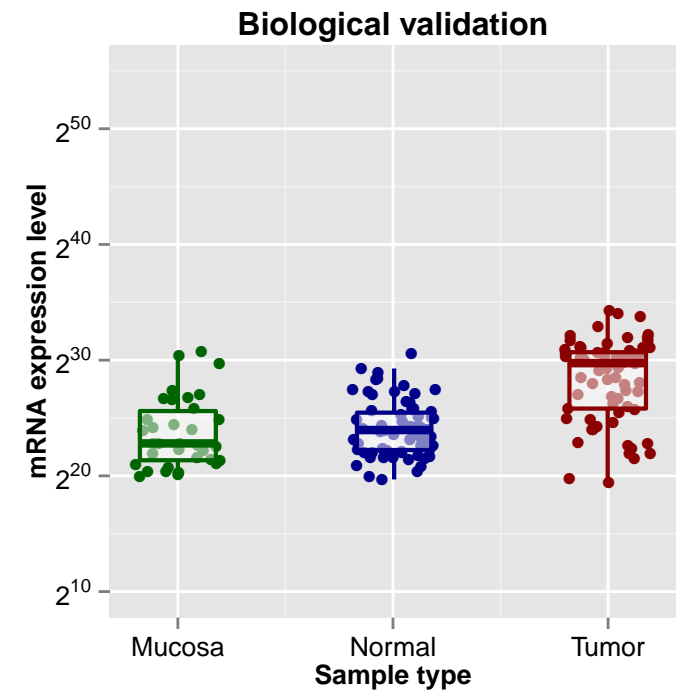

# SFRP2

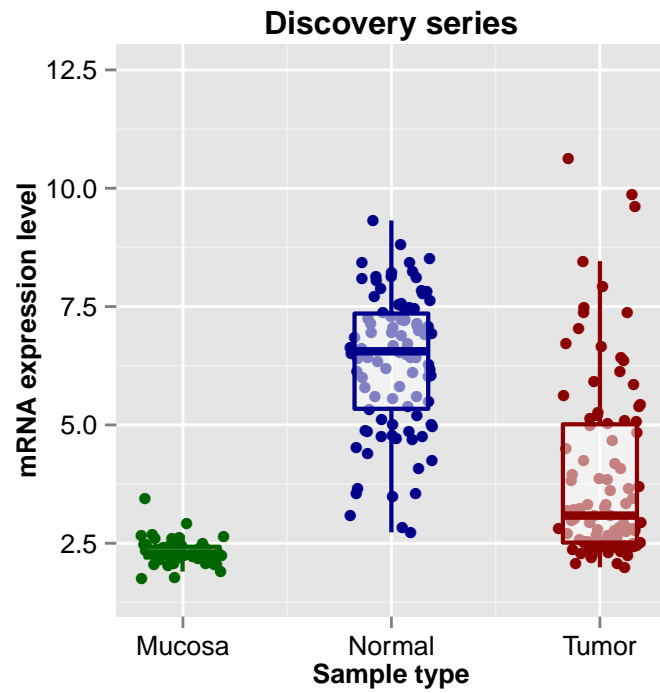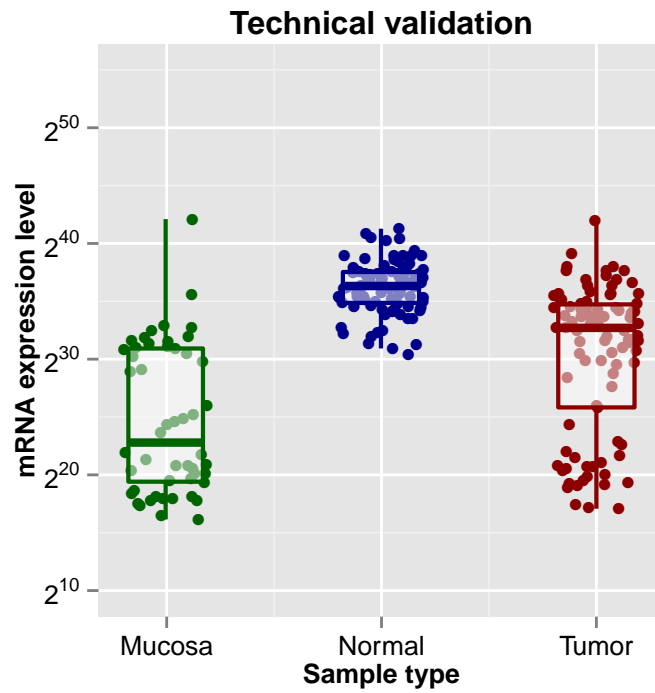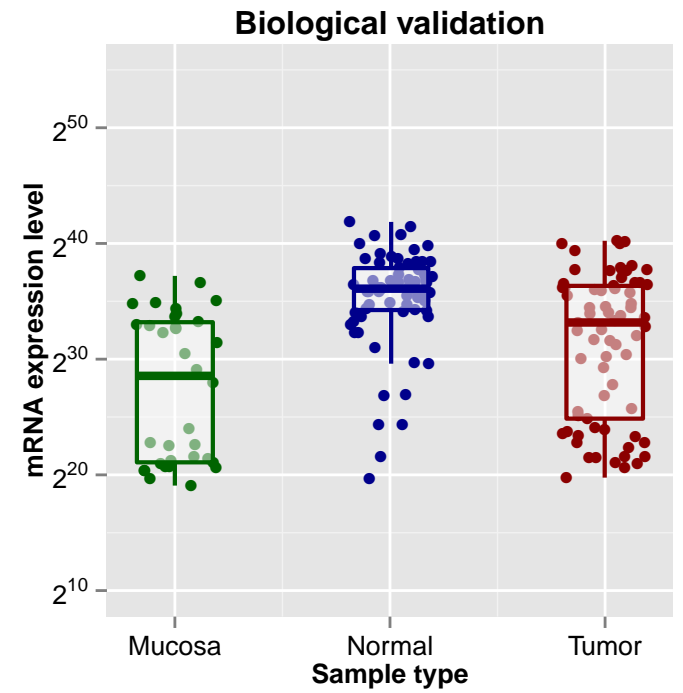

# SRPX2

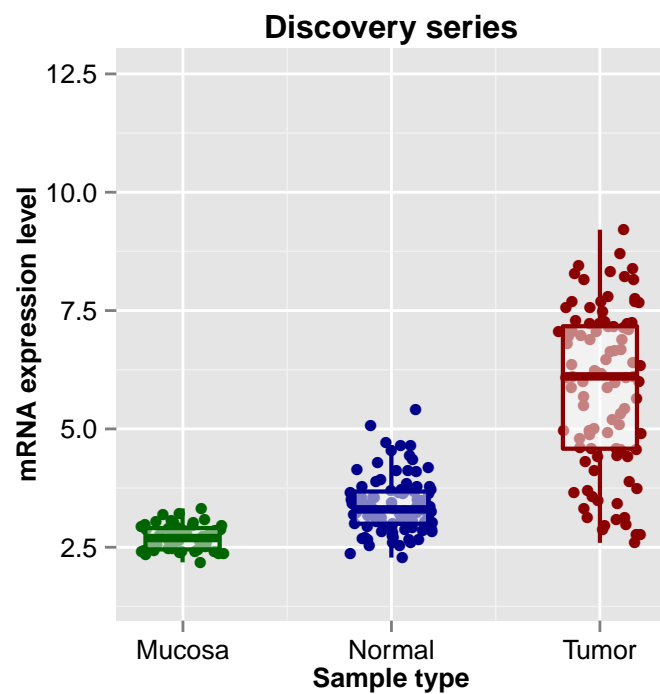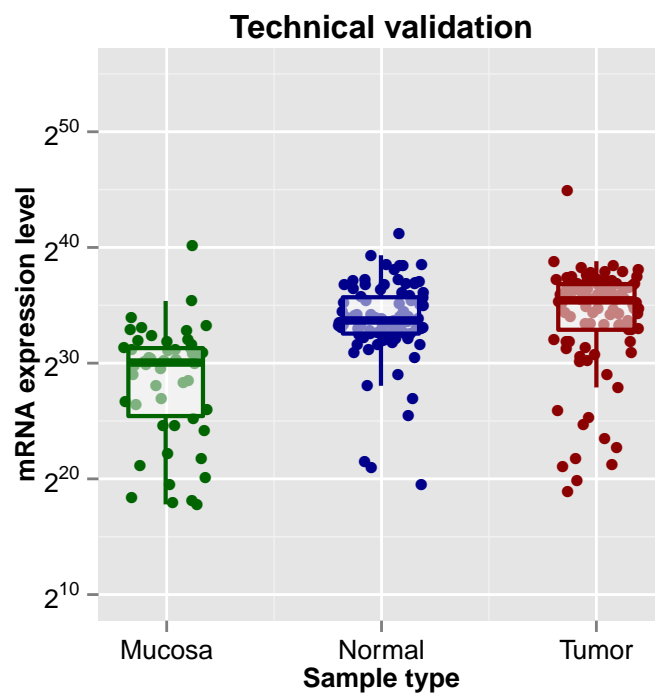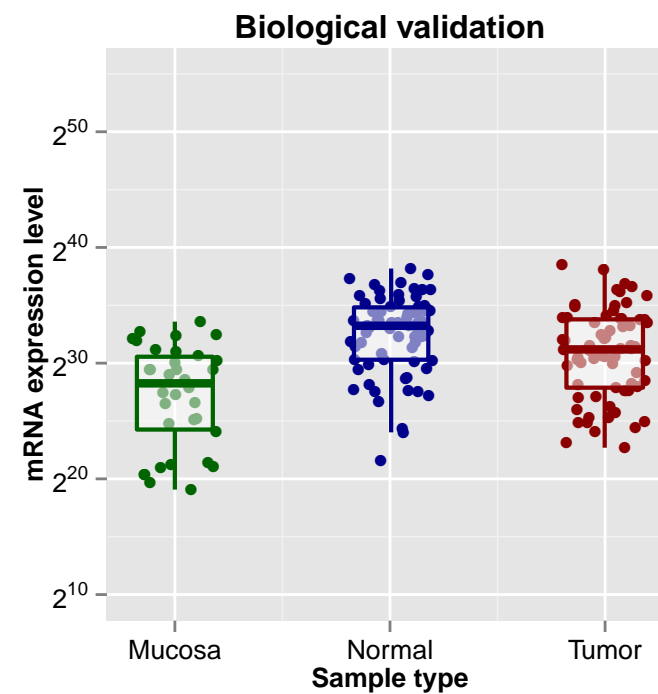

# THBS2

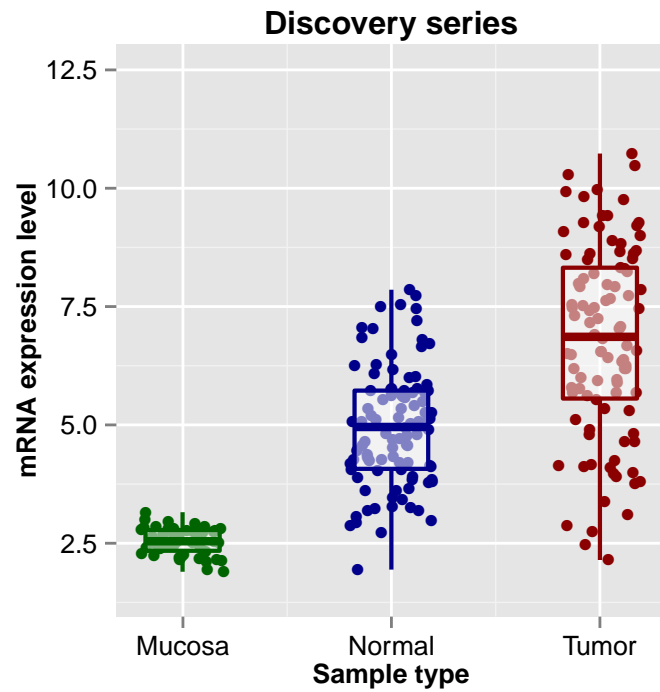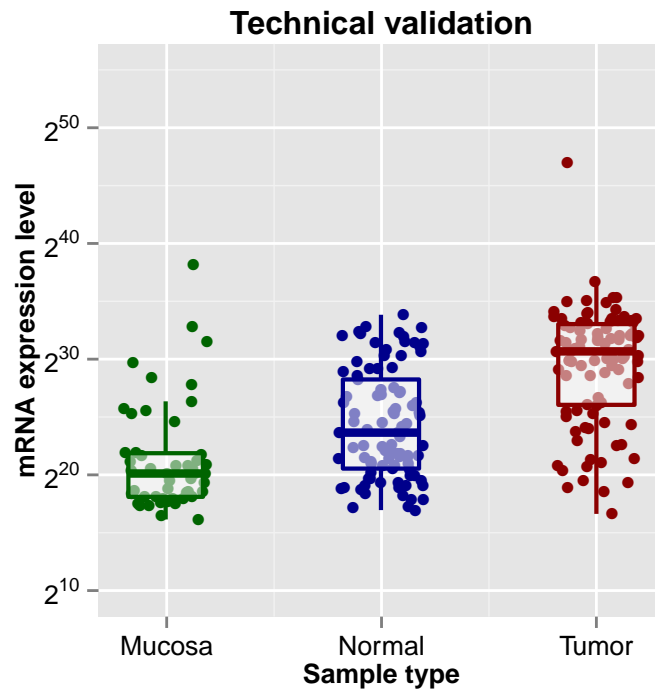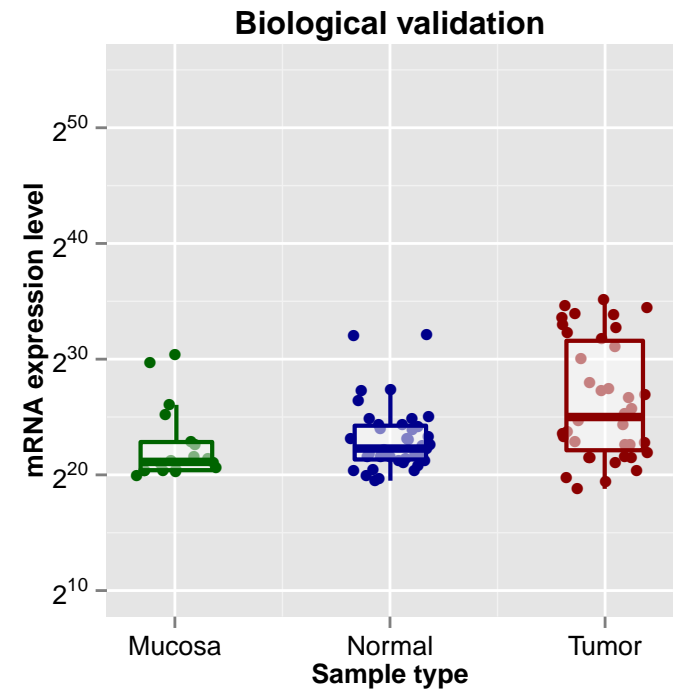

# TNC

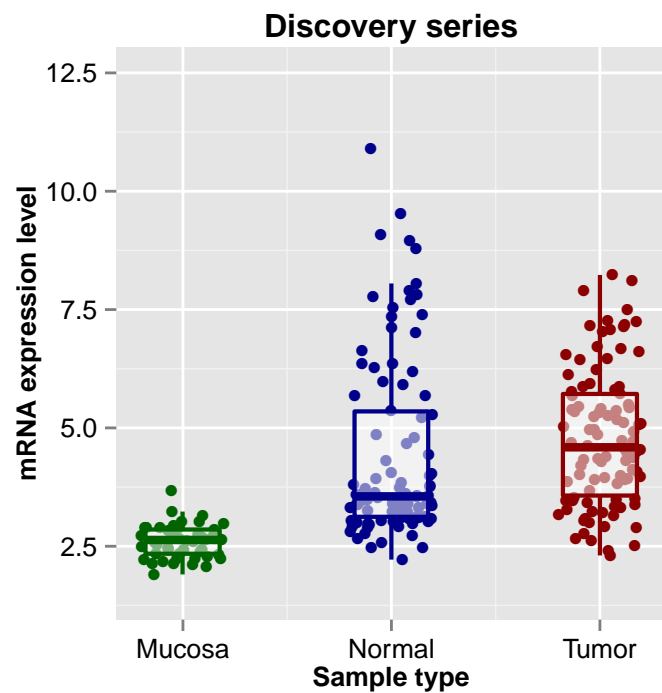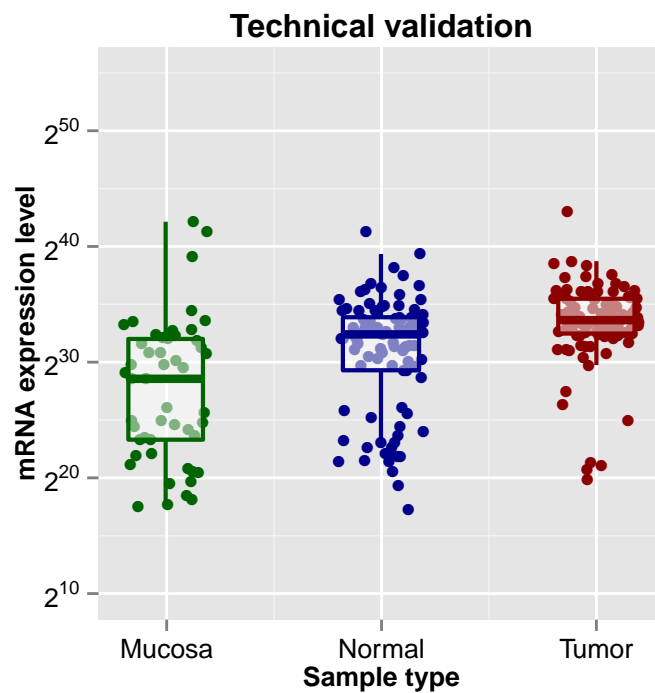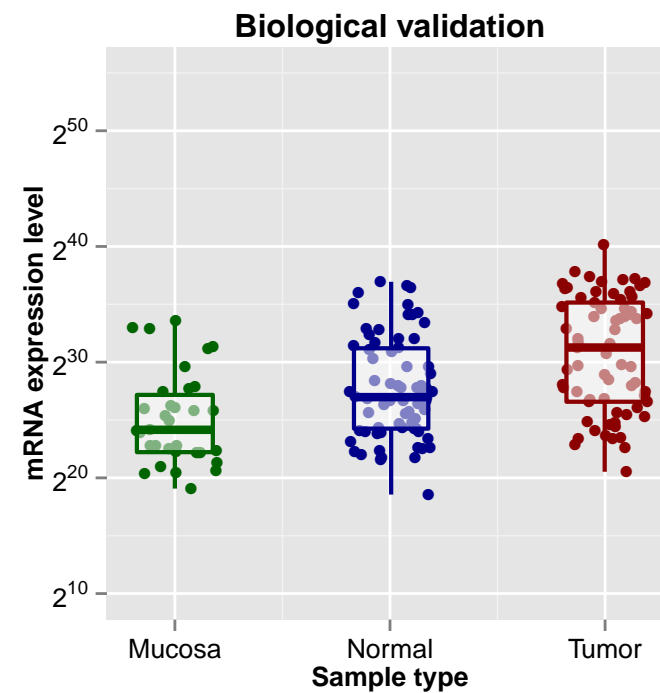

Supplement: S3 (10.1371/journal.pone.0106748.s003) [file journal.pone.0106748.s003]
